# Supplementary material for: Effect of oral pre-emptive analgesia on pain management after total knee arthroplasty: a protocol for systematic review and meta-analysis
Source: PubMed Central journal article supplement — BMJ Open. 2023 Mar 15;13(3):e070998. doi: 10.1136/bmjopen-2022-070998 (PMC10030931; doi:10.1136/bmjopen-2022-070998), 2023-03-15
Supplement: bmjopen-2022-070998supp001.pdf [file bmjopen-2022-070998supp001.pdf]

PubMed (<https://www.pubmed.ncbi.nlm.nih.gov>)

- #1 Total knee arthroplasty [Mesh]
- #2 Total knee arthroplasty [Title/Abstract] OR Knee Replacement Arthroplasty [Title/Abstract] OR Total Knee Replacement [Title/Abstract] OR Arthroplasties, Replacement, Knee [Title/Abstract] OR Arthroplasty, Knee Replacement [Title/Abstract] OR Arthroplasty, Total Knee [Title/Abstract] OR Knee Arthroplasty, Total [Title/Abstract] OR Replacement, Total Knee [Title/Abstract] OR Knee Replacement, Total [Title/Abstract]
- #3 #1 OR #2
- #4 Analgesia [Mesh]
- #5 Analgesia [Title/Abstract] OR Analgesics [Title/Abstract] OR Anodynes [Title/Abstract] OR Analgesic Drugs [Title/Abstract] OR Analgesic [Title/Abstract] OR Analgesic Agents [Title/Abstract] OR Antinociceptive Agents [Title/Abstract] OR Analgesics, Non-Narcotic [Title/Abstract] OR Analgesics, Short-Acting [Title/Abstract] OR Analgesics, Opioid [Title/Abstract] OR Anti-Inflammatory Agents, Non-Steroidal [Title/Abstract]
- #6 #4 OR #5
- #7 Preoperative Period [Title/Abstract] OR Preoperative [Title/Abstract] OR Preemptive [Title/Abstract]
- #8 Randomized controlled trial [Publication Type]
- #9 Controlled clinical trial [Publication Type]
- #10 Randomized [Title/Abstract]
- #11 Randomly [Title/Abstract]
- #12 Trial [Title/Abstract]
- #13 #8 OR #9 OR #10 OR #11 OR #12
- #14 #3 AND #6 AND #7 AND #13

---

**MEDLINE (<https://www.medline.eu/>)**

---

- #1 Total knee arthroplasty [Mesh]
  - #2 Total knee arthroplasty [Title/Abstract] OR Knee Replacement Arthroplasty [Title/Abstract] OR Total Knee Replacement [Title/Abstract] OR Arthroplasties, Replacement, Knee [Title/Abstract] OR Arthroplasty, Knee Replacement [Title/Abstract] OR Arthroplasty, Total Knee [Title/Abstract] OR Knee Arthroplasty, Total [Title/Abstract] OR Replacement, Total Knee [Title/Abstract] OR Knee Replacement, Total [Title/Abstract]
  - #3 #1 OR #2
  - #4 Analgesia [Mesh]
  - #5 Analgesia [Title/Abstract] OR Analgesics [Title/Abstract] OR Anodynes [Title/Abstract] OR Analgesic Drugs [Title/Abstract] OR Analgesic [Title/Abstract] OR Analgesic Agents [Title/Abstract] OR Antinociceptive Agents [Title/Abstract] OR Analgesics, Non-Narcotic [Title/Abstract] OR Analgesics, Short-Acting [Title/Abstract] OR Analgesics, Opioid [Title/Abstract] OR Anti-Inflammatory Agents, Non-Steroidal [Title/Abstract]
  - #6 #4 OR #5
  - #7 Preoperative Period [Title/Abstract] OR Preoperative [Title/Abstract] OR Preemptive [Title/Abstract]
  - #8 Randomized controlled trial [Publication Type]
  - #9 Controlled clinical trial [Publication Type]
  - #10 Randomized [Title/Abstract]
  - #11 Randomly [Title/Abstract]
  - #12 Trial [Title/Abstract]
  - #13 #8 OR #9 OR #10 OR #11 OR #12
  - #14 #3 AND #6 AND #7 AND #13
-

### EMBASE (<https://www.embase.com>)

- #1 'total knee arthroplasty'/exp OR 'total knee arthroplasty':ab,ti OR 'knee replacement arthroplasty':ab,ti OR 'total knee replacement':ab,ti OR 'arthroplasties, replacement, knee':ab,ti OR 'arthroplasty, knee replacement':ab,ti OR 'arthroplasty, total knee':ab,ti OR 'knee arthroplasty, total':ab,ti OR 'replacement, total knee':ab,ti OR 'knee replacement, total':ab,ti OR 'TKA':ab,ti
- #2 'analgesia'/exp OR 'analgesia':ab,ti OR 'analgesics':ab,ti OR 'anodynes':ab,ti OR 'analgesic Drugs':ab,ti OR 'analgesic':ab,ti OR 'analgesic agents':ab,ti OR 'antinociceptive agents':ab,ti OR 'analgesics, non-narcotic':ab,ti OR 'analgesics, short-acting':ab,ti OR 'analgesics, opioid':ab,ti OR 'anti-inflammatory agents, non-steroidal':ab,ti
- #3 'preoperative period'/exp OR 'preoperative period':ab,ti OR 'preoperative':ab,ti OR 'preemptive ':ab,ti
- #4 'randomized controlled trial'/exp
- #5 #1 AND #2 AND #3 AND #4

### Cochrane Central Register of Controlled Trials and the Cochrane Database of Systematic Reviews (<https://www.cochranelibrary.com>)

- #1 MeSH descriptor: [Arthroplasty, Replacement, Knee] explode all trees
- #2 (Total knee arthroplasty OR Knee Replacement Arthroplasty OR Total Knee Replacement OR Arthroplasties, Replacement, Knee OR Arthroplasty, Knee Replacement OR Arthroplasty, Total Knee OR Knee Arthroplasty, Total OR Replacement, Total Knee OR Knee Replacement, Total):ti,ab,kw
- #3 #1 OR #2
- #4 MeSH descriptor: [Analgesia] explode all trees
- #5 (Analgesia OR Analgesics OR Anodynes OR Analgesic Drugs OR

Analgesic OR Analgesic Agents OR Antinociceptive Agents OR Analgesics, Non-Narcotic OR Analgesics, Short-Acting OR Analgesics, Opioid OR Anti-Inflammatory Agents, Non-Steroidal):ti,ab,kw

#6 #4 OR #5

#7 #3 AND #6

#### WHO International Clinical Trial Registration Platform

(<http://www.who.int/trialsearch/>)

(Total knee arthroplasty OR Knee Replacement Arthroplasty OR Total Knee Replacement OR TKA) AND (Analgesia OR Analgesics OR Anodynes OR Analgesic Drugs OR Analgesic OR Analgesic Agents OR Antinociceptive Agents OR Analgesics, Non-Narcotic OR Analgesics, Short-Acting OR Analgesics, Opioid OR Anti-Inflammatory Agents, Non-Steroidal) AND (Preoperative Period OR Preoperative OR Preemptive)

#### Australian New Zealand Clinical Trials

(<http://www.anzctr.org.au/>)

| Search fields          | Search term                              |
|------------------------|------------------------------------------|
| Condition or disease   | Total knee arthroplasty                  |
| Study type             | Interventional Studies (Clinical Trials) |
| Intervention/treatment | Analgesia                                |

#### National Institutes of Health clinical registry

(<http://www.clinicaltrials.gov/>)

| Search fields          | Search term                              |
|------------------------|------------------------------------------|
| Condition or disease   | Total knee arthroplasty                  |
| Study type             | Interventional Studies (Clinical Trials) |
| Intervention/treatment | Analgesia                                |
